# Supplementary material for: Endoscopic sphincterotoMy for delayIng choLecystectomy in mild acute biliarY pancreatitis (EMILY study): protocol of a multicentre randomised clinical trial
Source: PubMed Central journal article supplement — BMJ Open. 2019 Jul 9;9(7):e025551. doi: 10.1136/bmjopen-2018-025551 (PMC6629406; doi:10.1136/bmjopen-2018-025551), 2019-07-09
Supplement: bmjopen-2018-025551supp001.pdf [file bmjopen-2018-025551supp001.pdf]

## QUESTIONNAIRE

### 1. Personal data

#### 1.1 Patient's data

Name: \_\_\_\_\_

Sex: Male / Female

Date of Birth: \_\_\_\_\_ Age: \_\_\_\_\_ Insurance number: \_\_\_\_\_

\_\_\_\_\_

Phone number: \_\_\_\_\_

The patient's study number:

#### 1.2 Doctors' data

##### DOCTOR No. 1:

Name of the doctor **responsible for the treatment of ABP**: \_\_\_\_\_

The phone number of the doctor: \_\_\_\_\_

Institute: \_\_\_\_\_

##### DOCTOR No. 2:

Name of the doctor **responsible for the randomization**: \_\_\_\_\_

The phone number of the doctor: \_\_\_\_\_

Institute: \_\_\_\_\_

##### DOCTOR No. 3:

Name of the doctor **responsible for the operation**: \_\_\_\_\_

The phone number of the doctor: \_\_\_\_\_

Institute: \_\_\_\_\_

##### DOCTOR No. 4:

Name of the doctor **responsible for the 90 days' visit**: \_\_\_\_\_

The phone number of the doctor: \_\_\_\_\_

Institute: \_\_\_\_\_

**E**ndoscopic sphincterotomy for delay **I**ng  
cholecystectomy in mild acute biliary **Y** pancreatitis

**2. Inclusion criteria** /DOCTOR No. 2/

|                                                                                                                                                                                                                                                                                                                                                                                                                             |            |           |
|-----------------------------------------------------------------------------------------------------------------------------------------------------------------------------------------------------------------------------------------------------------------------------------------------------------------------------------------------------------------------------------------------------------------------------|------------|-----------|
| Patients older than 18 age                                                                                                                                                                                                                                                                                                                                                                                                  | <b>YES</b> | <b>NO</b> |
| Diagnosis of acute pancreatitis (two of them have to be positive) <ul style="list-style-type: none"> <li>- upper abdominal pain</li> <li>- serum lipase or amylase is three times higher of upper limit of normal</li> <li>- characteristic findings of acute pancreatitis on abdominal imaging</li> </ul>                                                                                                                  | <b>YES</b> | <b>NO</b> |
| Presence of biliary pancreatitis (one of them has to be true) <ul style="list-style-type: none"> <li>- diagnosis of gallstone or sludge on imaging</li> <li>- the absence of gallstone or sludge with a dilated common bile duct on ultrasound (&gt;8 mm in patients ≤75 years of age or &gt;10 mm in patients &gt;75 years old)</li> <li>- alanine aminotransferase level &gt;2 times higher than normal values</li> </ul> | <b>YES</b> | <b>NO</b> |
| Mild acute biliary pancreatitis (all of them have to be true)<br>/HAS TO BE DETERMINED AT DISCHARGE OF THE PATIENT/ <ul style="list-style-type: none"> <li>- no peripancreatic fluid collections</li> <li>- no pancreatic necrosis</li> <li>- no persistent organ failure</li> </ul>                                                                                                                                        | <b>YES</b> | <b>NO</b> |
| ERCP/ES either during the index admission or in the medical history without complication                                                                                                                                                                                                                                                                                                                                    | <b>YES</b> | <b>NO</b> |
| Written informed consent                                                                                                                                                                                                                                                                                                                                                                                                    | <b>YES</b> | <b>NO</b> |
| <b>One „NO” is present = DO NOT INCLUDE!</b>                                                                                                                                                                                                                                                                                                                                                                                |            |           |

**3. Exclusion criteria** /DOCTOR No. 2/

|                                                                                                                                                                           |            |           |
|---------------------------------------------------------------------------------------------------------------------------------------------------------------------------|------------|-----------|
| American Society of Anesthesiologists (ASA) classification <ul style="list-style-type: none"> <li>- III patients &gt;75 years old</li> <li>- IV, V, VI. Groups</li> </ul> | <b>YES</b> | <b>NO</b> |
| Acute or chronic cholecystitis during hospitalization                                                                                                                     | <b>YES</b> | <b>NO</b> |
| Previous cholecystectomy                                                                                                                                                  | <b>YES</b> | <b>NO</b> |
| Continuous alcohol abuse or chronic pancreatitis                                                                                                                          | <b>YES</b> | <b>NO</b> |
| Pregnancy                                                                                                                                                                 | <b>YES</b> | <b>NO</b> |
| <b>One „YES” is present = EXCLUDE!</b>                                                                                                                                    |            |           |

**4. If all inclusions and no exclusion criteria are met, than the physician may indicate the patient to participate in the study.** / DOCTOR No. 2/

|                                                                                      |            |           |
|--------------------------------------------------------------------------------------|------------|-----------|
| The treating physician (DOCTOR No. 2) anticipates that the patient can be discharged | <b>YES</b> | <b>NO</b> |
| No need for analgesics                                                               | <b>YES</b> | <b>NO</b> |
| Declining C-reactive protein levels and <150 mg/l                                    | <b>YES</b> | <b>NO</b> |
| No evidence of local or systemic complications                                       | <b>YES</b> | <b>NO</b> |
| The patient has resumed solid oral nutrient                                          | <b>YES</b> | <b>NO</b> |
| <b>If all YES = RANDOMIZATION /see point 6/</b>                                      |            |           |

Date of admission (diagnosis of AP):.....

Date of discharge: .....

**5.1 Anamnesis**

History of upper abdominal surgery: Yes / No  
 If yes, interventions:.....  
 .....  
 History of biliary colics Yes / No  
 History of cholecystitis Yes / No  
 Fever Yes / No ..... °C  
 Diabetes Yes / No  
 Antibiotic therapy during the ABP Yes / No

BMI Weight:\_\_\_kg, Height:\_\_\_cm, BMI:\_\_\_kg/m<sup>2</sup>

ASA classification (ASA PHYSICAL STATUS CLASSIFICATION SYSTEM)

|                                                                                               |     |    |
|-----------------------------------------------------------------------------------------------|-----|----|
| I. group(Normal healthy patient)                                                              | YES | NO |
| II. group(Patient with <b>mild systemic disease</b> with no functional limitations)           | YES | NO |
| III. group(Patient with <b>moderate</b> systemic disease <b>with functional limitations</b> ) | YES | NO |

**5.2. Laboratory measurements**

At discharge after AP:

|                       |  |                           |  |
|-----------------------|--|---------------------------|--|
| Amylase(U/l)          |  | Hematocrit(%)             |  |
| Lipase(U/l)           |  | Hemoglobin(g/l)           |  |
| Gamma GT(U/l)         |  | Kreatinine(umol/l)        |  |
| White blood cell(G/l) |  | eGFR                      |  |
| ASAT/GOT(U/l)         |  | CRP(mg/l)                 |  |
| INR(U/l)              |  | Alkaline phosphatase(U/l) |  |

### 5.3. Pancreatic imaging /At discharge after AP/

#### 5.3.1 Abdominal Computed Tomography: yes/no

Modified CTSI Score (0-10): .....

Please NOTE! Abdominal CT is compulsory when the patient is discharged

- **CTSI:**

**CTSI Score: (I)** Normal pancreas 0 point, intrinsic pancreatic abnormalities with or without inflammatory changes in peripancreatic fat 2 points, Pancreatic or peripancreatic fluid collection or peripancreatic fat necrosis 4 points **(II)** Necrosis absent 0 Points, < 30% necrosis 2 Points, > 30% necrosis 4 points **(III)** presence of extrapancreatic findings 2 points.

MAXIMUM OF: 10 points

- **Pancreas Size:**

- Normal
- Partially enlarged (body AP diameter is over 2 cm and/or head AP diameter is over 2,5 cm, none exceeds 3 cm)
- Definitely enlarged (any part over 3 cm AP diameter)

- Largest diameter of peripancreatic **fat infiltration** ..... cm

- **Peripancreatic fluid:**

- none
- present
- Large pseudocyst(s)

- Size of peripancreatic fluid or pseudocyst: ..... cm

- **Necrotizing area** (nonenhancement):

- Largest diameter of necrosis area ..... cm
- Location of necrosis: .....
- Type: patchy / full width
- Estimated necrosis: 0%, < 30% , 30% - 60%, > 60%

- **Wirsung** dilatation: YES / NO (yes, diameter .....mm)

- Distant **abdominal fluid:**

- Small amount (hard to see, less than 2 cm in lesser pelvis, less than 1 cm around liver/spleen)

- Moderate amount (easy to see, but without pelvic or abdominal distension)
- Large amount with abdominal/pelvic distension
- **Pleural effusion:**
  - none
  - one sided:..... (AP diameter ..... cm)
  - Both sides, L - ..... cm, R.....cm
- **Extrapancreatic findings:**
  - Inflammation (Cholecystitis, Duodenitis, etc.) location: .....
  - Cholecystolithiasis
  - Choledocholithiasis
  - Signs of bowel ischaemia
  - Bowel distension, ileus
  - Venous thrombosis
  - Pseudoaneurysm
  - Parenchymal organ involvement, define: .....
  - none

Other Description:

.....  
.....  
.....  
.....

#### 5.4. Characteristics of AP

Date of diagnosis (admission).....

Date of EST:.....

Date of discharge: .....

**6. Randomization** / DOCTOR No. 2/

The patient will be randomized by an internet randomization module in the following 2 groups:

- Randomization:
- A.** Early cholecystectomy (within 6 days after discharge)
  - B.** Delayed cholecystectomy (between 45 and 60 days after discharge)

Please circle the relevant group after randomization:

|               |
|---------------|
| <b>A or B</b> |
|---------------|

Please inform the patient concerning the **1)** Date for imaging examination and blood measurements before the operation, **2)** Date for the operation, **3)** Date for the 90 days visit

**7. Operation** /responsibility of DOCTOR No. 3/

Date of operation: .....

Length of days between discharge and operation: .....

If the operation is not in the time period described in point 6 please provide the reason: .....

### 7.1 Anamnesis (between discharge after ABP and operation)

|                                                                                                                                                                                                                                                                                                                                                                                                                                                                      |     |    |
|----------------------------------------------------------------------------------------------------------------------------------------------------------------------------------------------------------------------------------------------------------------------------------------------------------------------------------------------------------------------------------------------------------------------------------------------------------------------|-----|----|
| <b>Acute pancreatitis</b><br>- Upper abdominal pain<br>- Serum lipase or amylase is three times higher of upper limit of normal<br>- Characteristic findings of acute pancreatitis on cross-sectional abdominal imaging                                                                                                                                                                                                                                              | YES | NO |
| <b>Biliary pancreatitis</b><br>- Diagnosis of gallstone or sludge on imaging<br>- Dilated common bile duct on ultrasound (>8 mm in patients ≤75 years old or >10 mm in patients >75 years old<br>- Alanine aminotransferase level >2 times higher than normal values                                                                                                                                                                                                 | YES | NO |
| <b>Cholecystitis</b><br>A. Local signs of inflammation:<br>1) Murphy's sign;<br>2) RUQ mass/pain/tenderness.<br>B. Systemic signs of inflammation:<br>1) Fever;<br>2) Elevated C-reactive protein;<br>3) Elevated white blood cell count.<br>C. Imaging findings characteristic of acute cholecystitis<br><b>Final diagnosis</b><br>1) One item in A and one item in B are positive;<br>2) C confirms the diagnosis when acute cholecystitis is suspected clinically | YES | NO |
| <b>Biliary colics</b><br>Upper abdominal pain (either right upper quadrant or epigastric pain) lasting at least 30 minutes, according to the Rome criteria                                                                                                                                                                                                                                                                                                           | YES | NO |
| <b>Cholangitis</b><br>1) Serum total bilirubin level >40 μmol/l (>2.3 mg/dl) and/or dilated common bile duct (>6 mm) on transabdominal or endoscopic ultrasound or computed tomography;<br>2) Temperature >38.5°C.                                                                                                                                                                                                                                                   | YES | NO |
| <b>Organ failure</b><br>1) Respiratory: PaO <sub>2</sub> ≤60 mmHg (SaO <sub>2</sub> ≤ 90%) or need for mechanical ventilation;<br>2) Cardiovascular: systolic blood pressure <90 mmHg or need for catecholamine support;<br>3) Renal: creatinine level >177 μmol/l after rehydration or need for hemofiltration or hemodialysis (not including pre-existent renal failure).                                                                                          | YES | NO |
| Mortality                                                                                                                                                                                                                                                                                                                                                                                                                                                            | YES | NO |

If any of the answers is **YES** please provide the dates: .....

Except mortality, all of the above mentioned diseases can occur multiple times.  
Please provide details for all events separately.

Other reasons for hospitalization: .....

**E**ndoscopic sphincterotomy for delay **I**ng  
cho**L**ecystectomy in mild acute biliar **Y** pancreatitis

**7.2 Laboratory measurements (no more than 24h before the operation)**

|                       |  |                           |  |
|-----------------------|--|---------------------------|--|
| Amylase(U/l)          |  | Hematocrit(%)             |  |
| Lipase(U/l)           |  | Hemoglobin(g/l)           |  |
| Gamma GT(U/l)         |  | Kreatinine(umol/l)        |  |
| White blood cell(G/l) |  | eGFR                      |  |
| ASAT/GOT(U/l)         |  | CRP(mg/l)                 |  |
| INR(U/l)              |  | Alcaline phosphatase(U/l) |  |

If the patient is in group A, and the operation is performed within 24h after the blood samples are taken during the discharge of the patients, NO ADDITIONAL BLOOD SAMPLE HAS TO BE TAKEN. Please copy the values from 5.2.

**7.3 Pancreatic imaging**

**7.3.1 Abdominal ultrasonography:**

- **Visualization:**
  - o Good, complete (head at least partially visualized, body and neck well visualized, tail: partially visualized)
  - o Partially, incomplete (only body or only head visualized)
  - o Poor, non-diagnostic
- **Size:**
  - o Normal
  - o Partially enlarged (body AP diameter is over 2 cm and/or head AP diameter is over 2,5 cm, none exceeds 3 cm)
  - o Definitely enlarged (any part over 3 cm AP diameter)
- **Peripancreatic fluid:**
  - o none
  - o present
  - o Large pseudocyst(s)
- Size of peripancreatic fluid or pseudocyst: ..... cm
- **Pancreas homogeneity:**
  - o Homogenous
  - o Inhomogeneous, includes area(s) of low echogenicity
  - o Inhomogeneous, includes calcifications
- In case of circumscribed low echogenicity area, it's size .....cm
- **Wirsung** dilatation: YES / NO (yes, diameter .....mm)

Other Description:

.....  
 .....  
 .....



**7.3.2 Abdominal Computed Tomography:** yes/no  
Modified CTSI Score (0-10): .....

- **CTSI:**

**CTSI Score: (I)** Normal pancreas 0 point, intrinsic pancreatic abnormalities with or without inflammatory changes in peripancreatic fat 2 points, Pancreatic or peripancreatic fluid collection or peripancreatic fat necrosis 4 points **(II)** Necrosis absent 0 Points, < 30% necrosis 2 Points, > 30% necrosis 4 points **(III)** presence of extrapancreatic findings 2 points.  
MAXIMUM OF: 10 points

- **Pancreas Size:**

- Normal
- Partially enlarged (body AP diameter is over 2 cm and/or head AP diameter is over 2,5 cm, none exceeds 3 cm)
- Definitely enlarged (any part over 3 cm AP diameter)

- Largest diameter of peripancreatic **fat infiltration** ..... cm

- **Peripancreatic fluid:**

- none
- present
- Large pseudocyst(s)

- Size of peripancreatic fluid or pseudocyst: ..... cm

- **Necrotizing area** (nonenhancement):

- Largest diameter of necrosis area ..... cm
- Location of necrosis: .....
- Type: patchy / full width
- Estimated necrosis: 0%, < 30% , 30% - 60%, > 60%

- **Wirsung** dilatation: YES / NO (yes, diameter .....mm)

- Distant **abdominal fluid:**

- Small amount (hard to see, less than 2 cm in lesser pelvis, less than 1 cm around liver/spleen)

- Moderate amount (easy to see, but without pelvic or abdominal distension)
- Large amount with abdominal/pelvic distension
- **Pleural effusion:**
  - none
  - one sided:..... (AP diameter ..... cm)
  - Both sides, L - ..... cm, R..... cm
- **Extrapancreatic findings:**
  - Inflammation (Cholecystitis, Duodenitis, etc.) location: .....
  - Cholecystolithiasis
  - Choledocholithiasis
  - Signs of bowel ischaemia
  - Bowel distension, ileus
  - Venous thrombosis
  - Pseudoaneurysm
  - Parenchymal organ involvement, define: .....
  - none

Other Description:

.....  
.....  
.....  
.....

If the patient is in group A, and the operation is performed within 24h after the imaging is performed during the discharge of the patients, NO ADDITIONAL IMAGING EXAMINATION HAS TO BE ORDERED. Please copy the details from 5.3.

#### 7.4. Characteristics of the Operation

The difficulty of cholecystectomy (10 – hard, 5 – average difficulty):

|   |   |   |   |   |   |   |   |   |    |
|---|---|---|---|---|---|---|---|---|----|
|   |   |   |   |   |   |   |   |   |    |
| 1 | 2 | 3 | 4 | 5 | 6 | 7 | 8 | 9 | 10 |

|                                                     |          |
|-----------------------------------------------------|----------|
| Conversion to open cholecystectomy:                 | Yes / No |
| The length of the operation (min): _____            |          |
| Days spent in hospital after cholecystectomy: _____ |          |
| Intenziv unit care:                                 | Yes / No |
| Mortality:                                          | Yes / No |
| Haemorrhage, reintervention needed:                 | Yes / No |
| No iatrogenic perforation of the gallbladder        | Yes / No |
| Common bile duct (CBD) injuries                     | Yes / No |
| Bile leakage                                        | Yes / No |
| Sub-hepatic abscess                                 | Yes / No |

#### 8. Visit 90 days after discharge / DOCTOR No. 4/

The visit has to be completed +/- 7 days (between 83 and 97 days after discharge)

Date of the visit: .....

Length of days between discharge and visit: .....

#### 8.1 Anamnesis (between the operation and visit)

|                                                                                                                                                                                                                                                                                                                                  |            |           |
|----------------------------------------------------------------------------------------------------------------------------------------------------------------------------------------------------------------------------------------------------------------------------------------------------------------------------------|------------|-----------|
| <b>Acut pancreatitis</b><br>- Upper abdominal pain<br>- Serum lipase or amylase is three times higher of upper limit of normal<br>- Characteristic findings of acute pancreatitis on cross-sectional abdominal imaging                                                                                                           | <b>YES</b> | <b>NO</b> |
| <b>Biliary pancreatitis</b><br>- Diagnosis of gallstone or sludge on imaging<br>- Dilated common bile duct on ultrasound (>8 mm in patients ≤75 years old or >10 mm in patients >75 years old<br>- Alanine aminotransferase level >2 times higher than normal values                                                             | <b>YES</b> | <b>NO</b> |
| <b>Cholecystitis</b><br>A. Local signs of inflammation:<br>1) Murphy's sign;<br>2) RUQ mass/pain/tenderness.<br>B. Systemic signs of inflammation:<br>1) Fever;<br>2) Elevated C-reactive protein;<br>3) Elevated white blood cell count.<br>C. Imaging findings characteristic of acute cholecystitis<br><b>Final diagnosis</b> | <b>YES</b> | <b>NO</b> |

|                                                                                                                                                                                                                                                                                                                                                                             |            |           |
|-----------------------------------------------------------------------------------------------------------------------------------------------------------------------------------------------------------------------------------------------------------------------------------------------------------------------------------------------------------------------------|------------|-----------|
| 1) One item in A and one item in B are positive<br>2) C confirms the diagnosis when acute cholecystitis is suspected clinically                                                                                                                                                                                                                                             |            |           |
| <b>Biliary colics</b><br>Upper abdominal pain (either right upper quadrant or epigastric pain) lasting at least 30 minutes, according to the Rome criteria                                                                                                                                                                                                                  | <b>YES</b> | <b>NO</b> |
| <b>Cholangitis</b><br>1) Serum total bilirubin level >40 µmol/l (>2.3 mg/dl) and/or dilated common bile duct (>6 mm) on transabdominal or endoscopic ultrasound or computed tomography;<br>2) Temperature >38.5°C.                                                                                                                                                          | <b>YES</b> | <b>NO</b> |
| <b>Organ failure</b><br>1) Respiratory: PaO <sub>2</sub> ≤60 mmHg (SaO <sub>2</sub> ≤ 90%) or need for mechanical ventilation;<br>2) Cardiovascular: systolic blood pressure <90 mmHg or need for catecholamine support;<br>3) Renal: creatinine level >177 µmol/l after rehydration or need for hemofiltration or hemodialysis (not including pre-existent renal failure). | <b>YES</b> | <b>NO</b> |
| Mortality                                                                                                                                                                                                                                                                                                                                                                   | <b>YES</b> | <b>NO</b> |

If any of the answers **YES** please provide the dates: .....

Except mortality, all of the above mentioned diseases can occur multiple times. Please provide details for all events separately.

Other reason for hospitalization: .....

**SIGNATURES:**

Doctor No.1.....

Date:.....

Doctor No.2.....

Date:.....

Doctor No.3.....

Date:.....

Doctor No.4.....

Date:.....
